# Supplementary material for: Graphene encapsulated hollow TiO2 nanospheres: efficient synthesis and enhanced photocatalytic activity
Source: Royal Society of Chemistry journal article supplement (doi:10.1039/c3ta01386c), 2013-01-01
Supplement: c3ta01386c.pdf [file c3ta01386c.pdf]

## Supporting Information

### Graphene encapsulated hollow TiO<sub>2</sub> nanospheres: efficient synthesis and enhanced photocatalytic activity

Jian Zhang<sup>a,b,d</sup>, Zhenping Zhu<sup>a</sup>, Yanping Tang<sup>c</sup> and Xinliang Feng<sup>\*b,c</sup>

<sup>a</sup> State Key Laboratory of Coal Conversion, Institute of Coal Chemistry, Chinese Academy of Sciences, Taiyuan 030001, China. E-mail: [zpzhu@sxicc.ac.cn](mailto:zpzhu@sxicc.ac.cn); Fax: +86-351-4048433; Tel: +86-351-4048715

<sup>b</sup> Max Planck Institute for Polymer Research, Ackermannweg 10, 55128 Mainz, Germany. E-mail: [feng@mpip-mainz.mpg.de](mailto:feng@mpip-mainz.mpg.de); Fax: (+49) 6131-379-100; Tel: (+49) 6131-379-488.

<sup>c</sup> School of Chemistry and Chemical Engineering, Shanghai Jiao Tong University, 200240, Shanghai, P. R. China.

<sup>d</sup> University of Chinese Academy of Sciences, Beijing 100049, China

**Synthesis of TiO<sub>2</sub> NSs and the blended TiO<sub>2</sub> NSs/graphene (TiO<sub>2</sub>-G):** TiO<sub>2</sub> NSs was directly produced from amine-modified TS NPs following the synthesis procedure of GT NSs. 200 mg TS NSs was etched in 2M NaOH solution and TiO<sub>2</sub> NSs was obtained after washing with water. Then, TiO<sub>2</sub> NSs was re-dispersed into graphene oxide (GO) solution, containing 4 mg GO. The dispersion was chemically reduced by hydrazine in 90 °C for 1h. After filtration, washing and dryness, the blended TiO<sub>2</sub> NSs/reduced graphene oxide (TiO<sub>2</sub>-G) was obtained.

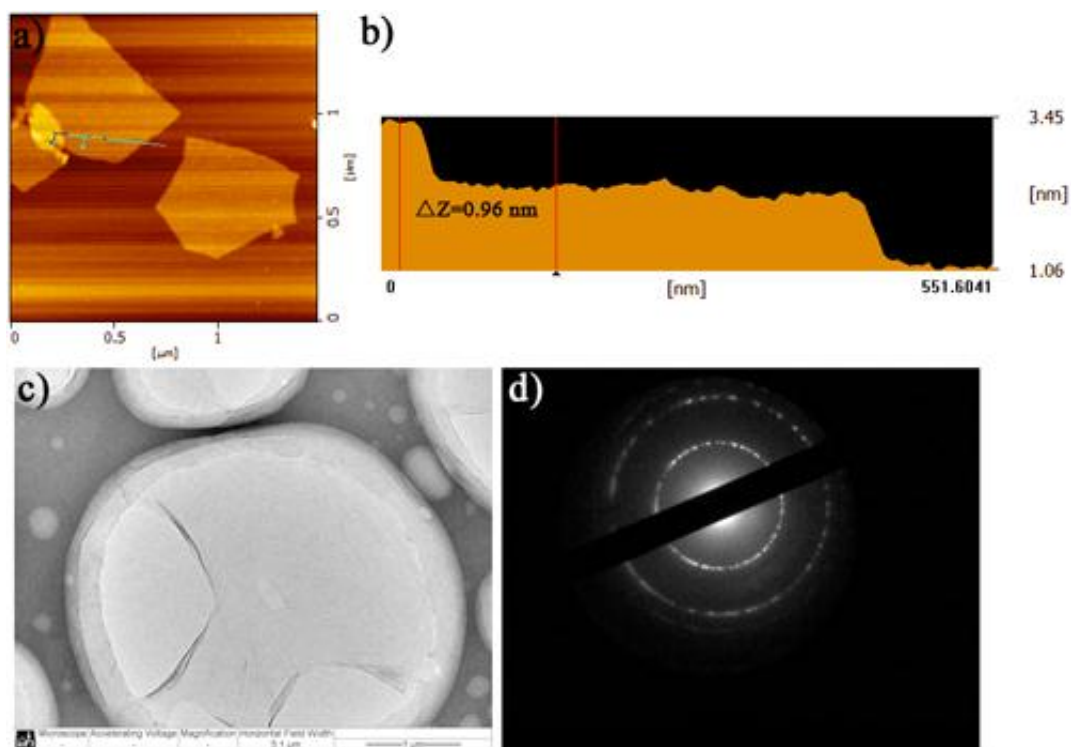

Fig. S1 AFM image (a) and corresponding thickness analysis of GO (b). TEM image (c) and electron diffraction pattern (d) of GO.

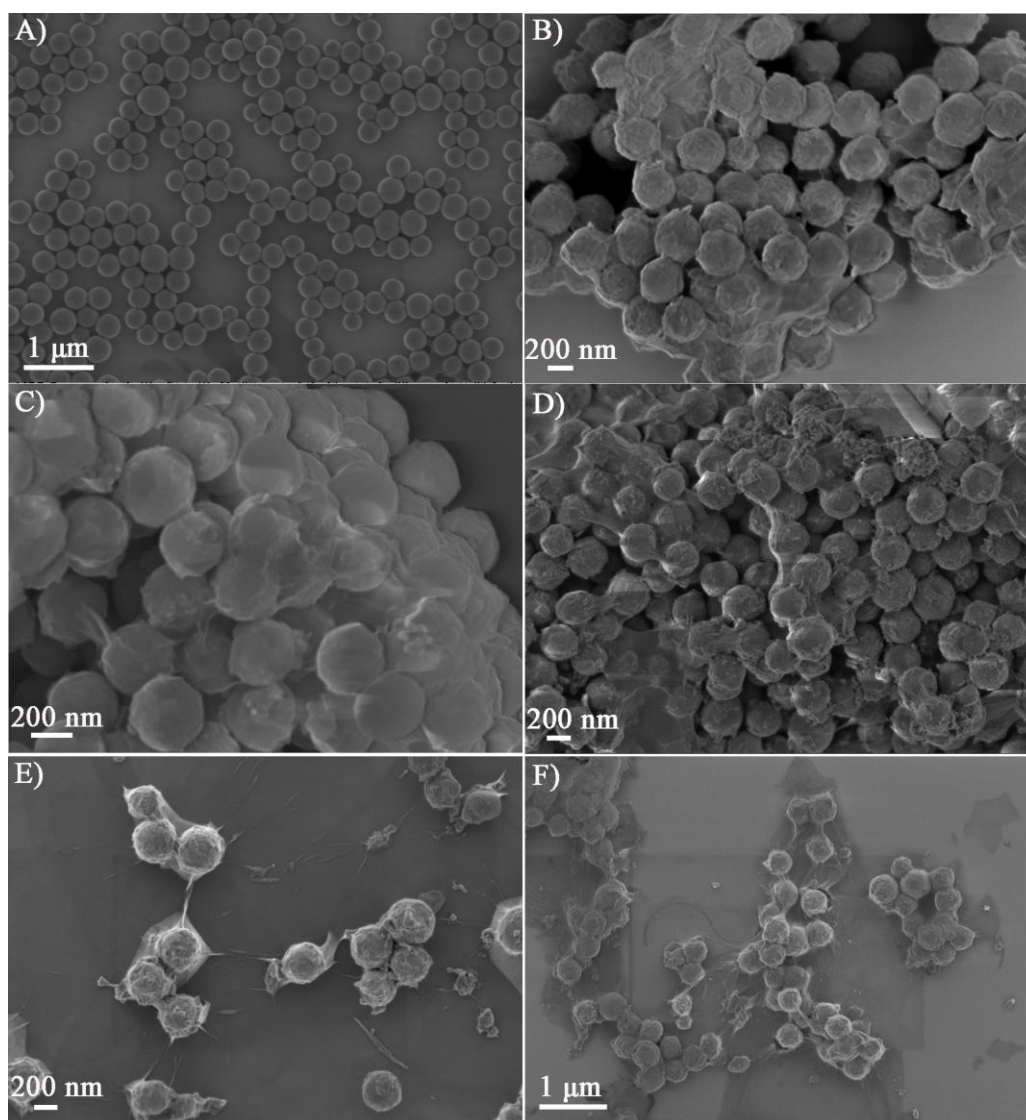

Fig. S2 SEM images of GOTS NSs with different weight ratios of TS NSs to GO: 100: 0 (A); 100:0.5 (B); 100:1 (C); 100:2 (D); 100:5 (E) and 100:10 (F).

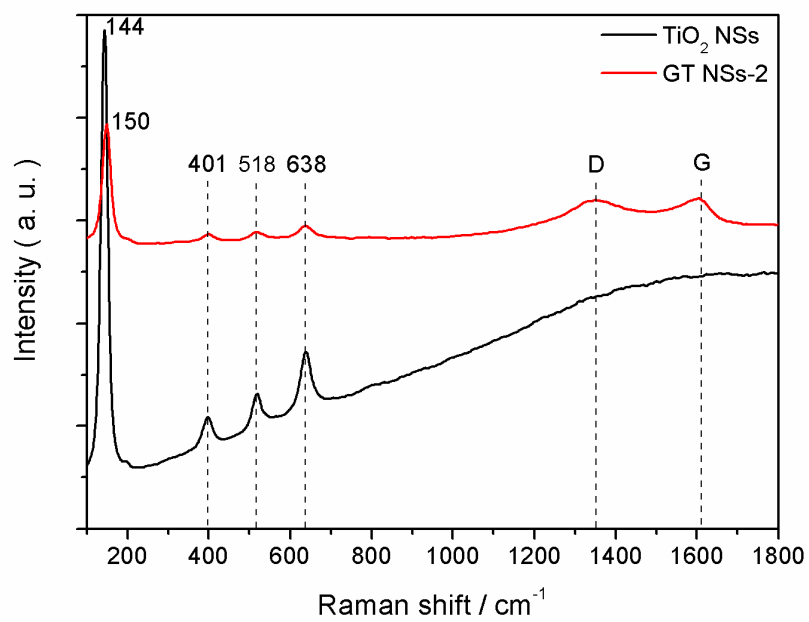

Fig. S3 Raman spectra of TiO<sub>2</sub> NSs and GT NSs-2 from 100 nm to 1800 nm.

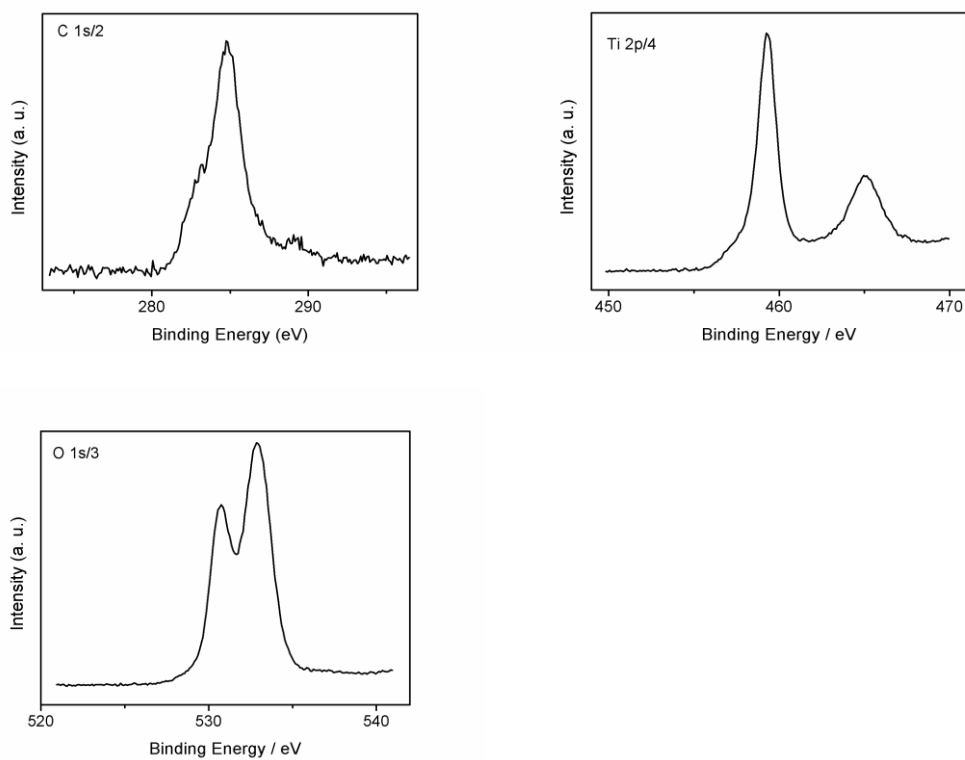

Fig. S4 High-resolution XPS spectra of GT NSs-2.

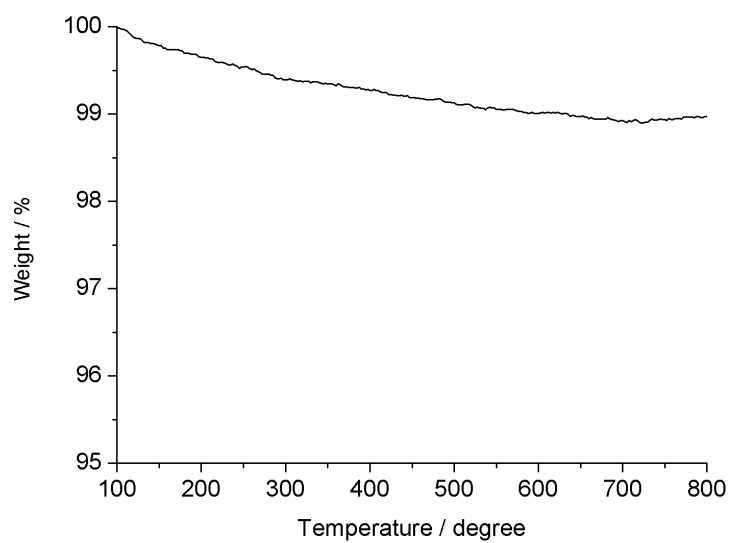

Fig. S5 Thermogravimetric analysis (TGA) of GT NSs-2.

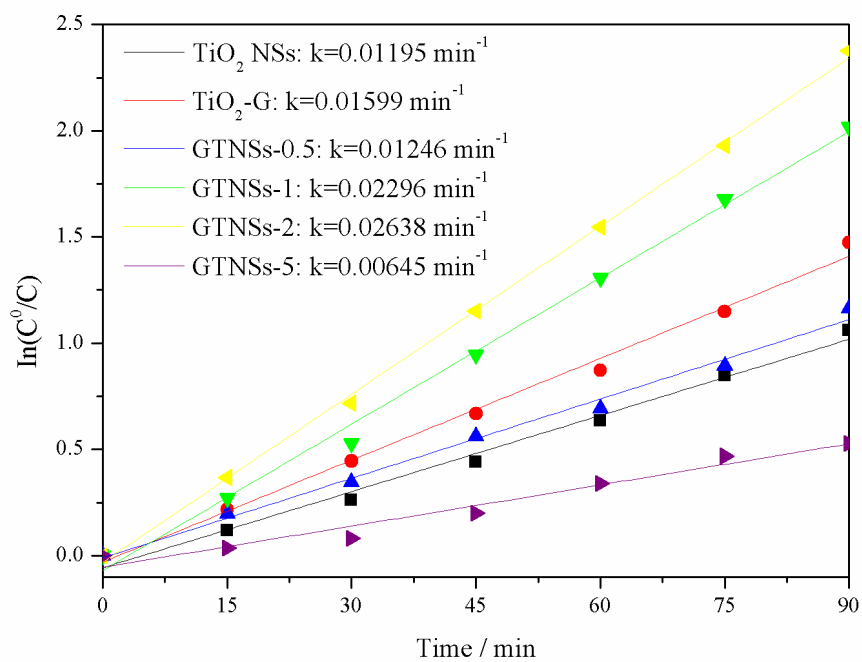

Fig. S6 Photocatalytic rate constants of degradation of RhB.

|           |       |       |       |      |      |
|-----------|-------|-------|-------|------|------|
| Time (h)  | 0 h   | 1 h   | 3 h   | 5 h  | 7 h  |
| TOC (ppm) | 15.14 | 14.58 | 11.97 | 9.63 | 8.06 |

Table S1. TOC result for the degradation of RhB using GT NSs-2 as catalyst.

|           |                      |                     |            |          |          |          |
|-----------|----------------------|---------------------|------------|----------|----------|----------|
| Samples   | TiO <sub>2</sub> NSs | TiO <sub>2</sub> -G | GT NSs-0.5 | GT NSs-1 | GT NSs-2 | GT NSs-5 |
| TOC (ppm) | 10.03                | 9.12                | 9.77       | 8.37     | 8.06     | 11.94    |

Table S2. TOC results for the degradation of RhB using different catalysts after irradiation for 7h.



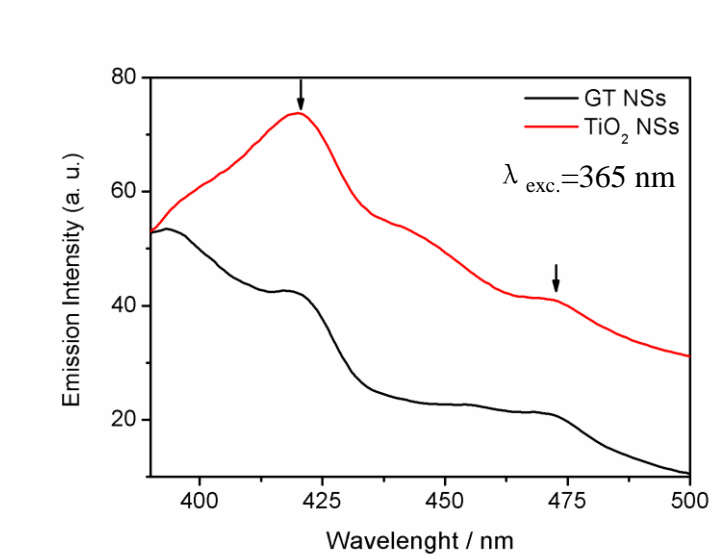

Fig. S7 Fluorescence spectrum of TiO<sub>2</sub> NSs and GT NSs-2.
